# Supplementary material
Source: publisher figshare collection journal article supplement (https://tandf.figshare.com/ndownloader/files/18501626)
Supplement: Supplementary file 1 [file 18501626]

## Sheet: Sup_Table 1
Supplementary Table 1. Experimental data set for water management option
Reference	Country	Site	Field type*1	Soil			Water management*3		Season	Year	Treatment	Number of replecation	CH4 EF (kg/ha)					N2O EF (kg/ha)					netGWP EF (Mg/ha)					Rice yield (Mg/ha)					Note
				Texture	pH*2	SOC (g C/kg)	Type	Mode					Mean- control	SD- control	Mean-option	SD- option	Effect size	Mean- control	SD- control	Mean-option	SD- option	Effect size	Mean- control	SD- control	Mean-option	SD- option	Effect size	Mean- control	SD- control	Mean-option	SD- option	Effect size
Husin et al. (1995)	Indonesia	Sukamandi, West Java	Ex	clay			SD		DS	1993	IR-64	3	437	138.641	191	72.2484	0.437071
Husin et al. (1995)	Indonesia	Sukamandi, West Java	Ex	clay			SD		DS	1993	Cisadane	3	381	98.2847	235	84.2135	0.616798
Bronson et al. (1997)	Philippines	Los Baños	Ex	clay	6.4	16.9	SD	a 2 wk drainage	DS	1994	urea	3	17.3333		6.66667		0.384615	0.407		1.00257		2.46332	0.710619		0.525433		0.739401	6		6.1		1.01667	measured by an automated chamber system
Bronson et al. (1997)	Philippines	Los Baños	Ex	clay	6.4	16.9	SD	a 2 wk drainage	DS	1994	straw	3	370.667		212		0.571942	0.044		0.259286		5.89286	12.6158		7.28527		0.577473	5.9		5.3		0.898305	measured by an automated chamber system
Suratno et al. (1998)	Indonesia	Bogor, West Java	Ex	clay	5.2	23.6	SD		WS	1995	Granule urea for IR-64	3						0.80652		0.768768		0.953191
Suratno et al. (1998)	Indonesia	Bogor, West Java	Ex	clay	5.2	23.6	SD		WS	1995	Granule urea for Cisadane	3						0.888624		1.29639		1.45887
Suratno et al. (1998)	Indonesia	Bogor, West Java	Ex	clay	5.2	23.6	SD		WS	1995	Tablet urea for IR-64	3						1.1257		0.885456		0.786585
Suratno et al. (1998)	Indonesia	Bogor, West Java	Ex	clay	5.2	23.6	SD		WS	1995	Tablet urea for Cisadane	3						1.01942		1.20022		1.17736
Corton et al. (2000)	Philippines	Maligaya, Muñoz, Nueva Ecija	Ex	silty clay	6.88	13.2	SD	a 7-10 days drainage	DS	1997	transplanted	3	89		51		0.573034											7.91		7.74		0.978508	measured by an automated chamber system
Corton et al. (2000)	Philippines	Maligaya, Muñoz, Nueva Ecija	Ex	silty clay	6.88	13.2	SD	a 7-10 days drainage	DS	1997	direct seeded	3	75		48		0.64											6.71		6.42		0.956781	measured by an automated chamber system
Corton et al. (2000)	Philippines	Maligaya, Muñoz, Nueva Ecija	Ex	silty clay	6.88	13.2	SD	a 7-10 days drainage	WS	1997	transplanted	3	348		323		0.928161											5.36		5.45		1.01679	measured by an automated chamber system
Corton et al. (2000)	Philippines	Maligaya, Muñoz, Nueva Ecija	Ex	silty clay	6.88	13.2	SD	a 7-10 days drainage	WS	1997	direct seeded	3	272		150		0.551471											3.84		3.41		0.888021	measured by an automated chamber system
Wassmann et al. (2000)	Philippines	Los Baños	Ex	silty clay	6.6	12	SD	a 20 days drainage	DS	1994		4	225		45		0.2											5.3		5.1		0.962264	measured by an automated chamber system
Wassmann et al. (2000)	Philippines	Los Baños	Ex	silty clay	6.6	12	SD	a 20 days drainage	DS	1996		4	20		8		0.4											4.6		4.2		0.913043	measured by an automated chamber system
Wassmann et al. (2000)	Philippines	Los Baños	Ex	silty clay	6.6	12	SD	a 20 days drainage	WS	1994		4	27		11		0.407407											3.8		3.4		0.894737	measured by an automated chamber system
Wassmann et al. (2000)	Philippines	Los Baños	Ex	silty clay	6.6	12	SD	a 20 days drainage	WS	1996		4	40		34		0.85											3		2.9		0.966667	measured by an automated chamber system
Setyanto and Baker (2005)	Indonesia	Jakenan, Pati, Central Java	Ex	clay loam	5.2	5.3	MD	6 days x 2 drainage	DS	2002		3	254	29	136	20	0.535433											3.482	0.167	3.529	0.207	1.0135
Setyanto and Baker (2005)	Indonesia	Jakenan, Pati, Central Java	Ex	clay loam	5.2	5.3	MD	AWD (up to 30 cm)	DS	2002		3	254	29	96	5.8	0.377953											3.482	0.167	2.986	0.375	0.857553
Towprayoon et al. (2005)	Thailand	Samutsakorn province	F	clay	6.1	23	SD	a 7 days drainage	WS	2002		2	243.6	16.3	173.6	5.3	0.712644	0.3715	0.1225	0.5138	0.082	1.38304	8.39311	0.590705	6.05551	0.204636	0.721486	4.35	0.0849	4.08	0.0566	0.937931
Towprayoon et al. (2005)	Thailand	Samutsakorn province	F	clay	6.1	23	MD	3 days x 2 drainage	WS	2002		2	243.6	16.3	156.8	18.2	0.643678	0.3715	0.1225	0.3848	0.0599	1.0358	8.39311	0.590705	5.44587	0.63665	0.64885	4.35	0.0849	3.88	0.0283	0.891954
Hadi et al. (2010)	Indonesia	Sungai Rangas, South Kalimantan	F		4.1	23.7	SD		WS	2004		3	1668		1420		0.851319	27.9714		-158.086		-5.65169	65.0475		1.17046		0.0179939
Hadi et al. (2010)	Indonesia	Sungai Rangas, South Kalimantan	F		4.1	23.7	SD		DS	2004/2005		3	1757.33		1505.33		0.856601	83.6		18.5429		0.221805	84.6621		56.7071		0.669805
Hadi et al. (2010)	Indonesia	Sungai Rangas, South Kalimantan	F		4.1	23.7	SD		WS	2005		3	2113.33		1588		0.75142	-93.0286		-46.5143		0.5	44.1308		40.1307		0.909359
Ly et al. (2013)	Cambodia	Tramkak, Takeo	F	sandy	4.05	2.87	MD	1 wk x 2 drainage	WS	2011	control	3	154.769	22.7558	154.693	91.43	0.999511											2.60149		2.27463		0.874355	AWD as a component of SRI
Ly et al. (2013)	Cambodia	Tramkak, Takeo	F	sandy	4.05	2.87	MD	1 wk x 2 drainage	WS	2011	FYM	3	226.382	50.0984	177.631	65.8392	0.784651											3.03134		2.97761		0.982275	AWD as a component of SRI
Ly et al. (2013)	Cambodia	Tramkak, Takeo	F	sandy	4.05	2.87	MD	1 wk x 2 drainage	WS	2011	MF	3	194.89	65.2562	169.455	37.4826	0.869489											5.00149		4.55821		0.91137	AWD as a component of SRI
Ly et al. (2013)	Cambodia	Tramkak, Takeo	F	sandy	4.05	2.87	MD	1 wk x 2 drainage	WS	2011	FYM+MF	3	282.097	80.9804	212.983	90.8142	0.754998											5.45373		5.20746		0.954844	AWD as a component of SRI
Jiaphasuanan and Towprayoon (2014)	Thailand	Samutsakorn	F	clay	5.17	30.5	SD	a 3 days drainage	DS	2007	straw burned	3	68	10	66	8	0.970588	8.9	0.7	7.6	1.6	0.853933	4.9642	0.5486	4.5088	0.7488	0.908263
Jiaphasuanan and Towprayoon (2014)	Thailand	Samutsakorn	F	clay	5.17	30.5	SD	a 3 days drainage	DS	2007	straw un-burned	3	167	48	128	6	0.766467	5.3	0.2	6.4	0.4	1.20755	7.2574	1.6916	6.2592	0.3232	0.862458
Jiaphasuanan and Towprayoon (2014)	Thailand	Samutsakorn	F	clay	5.17	30.5	SD	a 3 days drainage	WS	2007	straw burned	3	156	9	144	17	0.923077	5.5	0.3	4	0.7	0.727273	6.943	0.3954	6.088	0.7866	0.876854
Jiaphasuanan and Towprayoon (2014)	Thailand	Samutsakorn	F	clay	5.17	30.5	SD	a 3 days drainage	WS	2007	straw un-burned	3	227	15	112	9	0.493392	4.5	0.9	4	0.4	0.888889	9.059	0.7782	5	0.4252	0.551937
Pandey et al. (2014)	Vietnam	Hanoi		silt loam	5.7	12.55	MD	safe AWD	DS	2013	Control	3	108	12	31	8	0.287037	0.31	0.01	0.74	0.06	2.3871	3.76438	0.41098	1.27452	0.28988	0.338574	5.57	0.86	5.25	0.7	0.942549
Pandey et al. (2014)	Vietnam	Hanoi		silt loam	5.7	12.55	MD	safe AWD	DS	2013	FYM	3	353	7	105	13	0.29745	0.44	0.03	0.97	0.12	2.20455	12.1331	0.24694	3.85906	0.47776	0.31806	6.02	0.29	5.35	0.17	0.888704
Pandey et al. (2014)	Vietnam	Hanoi		silt loam	5.7	12.55	MD	safe AWD	DS	2013	RSC	3	252	61	79	11	0.313492	0.42	0.01	0.78	0.04	1.85714	8.69316	2.07698	2.91844	0.38592	0.335717	5.33	0.1	5.48	0.9	1.02814
Pandey et al. (2014)	Vietnam	Hanoi		silt loam	5.7	12.55	MD	safe AWD	DS	2013	biochar	3	140	8	46	5	0.328571	0.27	0.01	0.67	0.06	2.48148	4.84046	0.27498	1.76366	0.18788	0.364358	5.42	0.31	4.95	0.36	0.913284
Thu et al. (2016)	Vietnam	Hanoi		silt loam	5.07	26.2	MD	safe AWD	WS	2012	Control	3	459.83		288.46		0.627319	1.872		2.53		1.3515	16.1921		10.5616		0.652268	3.53		3.52		0.997167
Thu et al. (2016)	Vietnam	Hanoi		silt loam	5.07	26.2	MD	safe AWD	WS	2012	FYM	3	693.66		545.16		0.785918	3.499		4.123		1.17834	24.6271		19.7641		0.802533	4.74		4.49		0.947257
Thu et al. (2016)	Vietnam	Hanoi		silt loam	5.07	26.2	MD	safe AWD	WS	2012	RSC	3	546.07		369.79		0.677184	3.258		3.83		1.17557	19.5373		13.7142		0.701951	3.85		3.73		0.968831
Thu et al. (2016)	Vietnam	Hanoi		silt loam	5.07	26.2	MD	safe AWD	WS	2012	biochar	3	272.11		237.32		0.872147	1.704		1.73		1.01526	9.75953		8.58442		0.879593	3.81		3.57		0.937008
Tariq et al. (2017)	Vietnam	EWM site, Hai Duong province	F	loam	5.14	9.11	SD	a 11 days drainage	DS	2013	EWM site-M	3	129.6	142.028	92.1	93.5307	0.710648	1.1	1.03923	1.2	0.519615	1.09091	4.7342	5.13865	3.489	3.33489	0.736978	5.31	0.866025	5.56	0.536936	1.04708
Tariq et al. (2017)	Vietnam	IWM site, Hai Duong province	F	loam	5.16	13	SD	a 11 days drainage	DS	2013	IWM site-M	3	273.9	109.119	88.4	13.8564	0.322746	0.6	0.34641	0.7	0.34641	1.16667	9.4914	3.81328	3.2142	0.574348	0.338643	4.99	0.536936	4.5	0.883346	0.901804
Tariq et al. (2017)	Vietnam	EWM site, Hai Duong province	F	loam	5.14	9.11	MD	pre- & mid-season drainage	DS	2013	EWM site-PM	3	129.6	142.028	107.2	51.9615	0.82716	1.1	1.03923	1.8	0.519615	1.63636	4.7342	5.13865	4.1812	1.92154	0.88319	5.31	0.866025	5.48	1.351	1.03202
Tariq et al. (2017)	Vietnam	EWM site, Hai Duong province	F	loam	5.14	9.11	MD	early- & mid-season drainage	DS	2013	EWM site-EM	3	129.6	142.028	36.1	27.7128	0.278549	1.1	1.03923	2	0.69282	1.81818	4.7342	5.13865	1.8234	1.1487	0.385155	5.31	0.866025	5.94	0.311769	1.11864
Tariq et al. (2017)	Vietnam	IWM site, Hai Duong province	F	loam	5.16	13	MD	pre- & mid-season drainage	DS	2013	IWM site-PM	3	273.9	109.119	154.3	83.1384	0.563344	0.6	0.34641	1.4	0.866025	2.33333	9.4914	3.81328	5.6634	3.08478	0.596688	4.99	0.536936	5.32	0.32909	1.06613
Tariq et al. (2017)	Vietnam	IWM site, Hai Duong province	F	loam	5.16	13	MD	early- & mid-season drainage	DS	2013	IWM site-EM	3	273.9	109.119	134.9	93.5307	0.492516	0.6	0.34641	0.7	0.519615	1.16667	9.4914	3.81328	4.7952	3.33489	0.505215	4.99	0.536936	4.47	0.588897	0.895792
Tariq et al. (2017)	Vietnam	EWM site, Hai Duong province	F	loam	5.14	9.11	SD	a 10 days drainage	WS	2013	EWM site-M	3	698.5	536.936	486.5	226.899	0.696492	0.3	0.173205	0.1	0	0.333333	23.8384	18.3074	16.5708	7.71455	0.695131	4.99	0.536936	4.67	0.103923	0.935872
Tariq et al. (2017)	Vietnam	IWM site, Hai Duong province	F	loam	5.16	13	SD	a 10 days drainage	WS	2013	IWM site-M	3	749.1	154.153	447.5	1.5242	0.597384	0.4	0.173205	0.7	0.69282	1.75	25.5886	5.2928	15.4236	0.258283	0.602753	3.61	0.207846	3.98	0.207846	1.10249
Tariq et al. (2017)	Vietnam	EWM site, Hai Duong province	F	loam	5.14	9.11	MD	pre- & mid-season drainage	WS	2013	EWM site-PM	3	698.5	536.936	627.4	166.277	0.89821	0.3	0.173205	0.7	0.34641	2.33333	23.8384	18.3074	21.5402	5.75664	0.903593	4.99	0.536936	5.14	0.536936	1.03006
Tariq et al. (2017)	Vietnam	EWM site, Hai Duong province	F	loam	5.14	9.11	MD	early- & mid-season drainage	WS	2013	EWM site-EM	3	698.5	536.936	222.6	110.851	0.318683	0.3	0.173205	0.6	0.34641	2	23.8384	18.3074	7.7472	3.87217	0.324988	4.99	0.536936	4.82	0.796743	0.965932
Tariq et al. (2017)	Vietnam	IWM site, Hai Duong province	F	loam	5.16	13	MD	pre- & mid-season drainage	WS	2013	IWM site-PM	3	749.1	154.153	472.8	218.238	0.631157	0.4	0.173205	0.5	0.69282	1.25	25.5886	5.2928	16.2242	7.62657	0.63404	3.61	0.207846	4.22	0.450333	1.16898
Tariq et al. (2017)	Vietnam	IWM site, Hai Duong province	F	loam	5.16	13	MD	early- & mid-season drainage	WS	2013	IWM site-EM	3	749.1	154.153	448.1	62.3538	0.598184	0.4	0.173205	0.7	0.34641	1.75	25.5886	5.2928	15.444	2.22326	0.60355	3.61	0.207846	3.98	0.433013	1.10249
Tirol-Padre et al. (2017)	Vietnam	Duy Xuyen, delta lowland	Ex	silt loam	4.48	11.5	MD	safe AWD	DS	2011	DL site in 2011	3	696.3		450		0.646273											5.73		5.84		1.0192
Tirol-Padre et al. (2017)	Vietnam	Duy Xuyen, delta lowland	Ex	silt loam	4.48	11.5	MD	safe AWD	DS	2012	DL site in 2012	3	103.7		82		0.790743	1.5		1.07		0.713333	3.9728		3.10686		0.782033	5.52		6.07		1.09964
Tirol-Padre et al. (2017)	Vietnam	Dai Loc, hilly midland	Ex	silty clay loam	4.59	11.9	MD	safe AWD	DS	2011	HM site in 2011	3	231		201.6		0.872727											6.14		5.82		0.947883
Tirol-Padre et al. (2017)	Vietnam	Dai Loc, hilly midland	Ex	silty clay loam	4.59	11.9	MD	safe AWD	DS	2012	HM site in 2012	3	83.4		45.5		0.545564	0.61		0.54		0.885246	3.01738		1.70792		0.566027	5.79		6.14		1.06045
Tirol-Padre et al. (2017)	Vietnam	Duy Xuyen, delta lowland	Ex	silt loam	4.48	11.5	MD	safe AWD	WS	2011/2012	DL site in 2012	3	461		286.4		0.621258	0.84		0.7		0.833333	15.9243		9.9462		0.624592	5.48		5.97		1.08942
Tirol-Padre et al. (2017)	Vietnam	Dai Loc, hilly midland	Ex	silty clay loam	4.59	11.9	MD	safe AWD	WS	2011/2012	HM site in 2012	3	304.6		234.8		0.770847	1.83		0.5		0.273224	10.9017		8.1322		0.745954	6.12		6.27		1.02451
Chidthaisong et al. (2018)	Thailand	Prachin Buri	Ex	clay	4.8	30	MD	safe AWD	DS	2013/2014	AWD S1	3	24.7	9.4	12.3	4.3	0.497976	1.65	0.66	3.29	0.81	1.99394	1.33	0.19	1.4	0.34	1.05263	5.29	0.36	5.09	0.47	0.962193
Chidthaisong et al. (2018)	Thailand	Prachin Buri	Ex	clay	4.8	30	MD	safe AWD	DS	2015	AWD S2	3	13.7	5.9	4.8	1.6	0.350365	1.09	1.3	0.22	0.14	0.201835	0.791	0.545	0.228	0.036	0.288243	4.97	0.04	4.79	0.55	0.963783
Chidthaisong et al. (2018)	Thailand	Prachin Buri	Ex	clay	4.8	30	MD	safe AWD	DS	2016	AWD S3	3	1.7	0.8	2.4	0.3	1.41176	0.19	0.09	0.2	0.05	1.05263	0.115	0.036	0.141	0.023	1.22609	3.67	0.27	2.54	0.34	0.692098
Chidthaisong et al. (2018)	Thailand	Prachin Buri	Ex	clay	4.8	30	MD	safe AWD	DS	2013/2014	AWDS S1	3	24.7	9.4	23.9	12.6	0.967611	1.65	0.66	2.7	1.53	1.63636	1.33	0.19	1.62	0.73	1.21805	5.29	0.36	5.34	0.4	1.00945
Chidthaisong et al. (2018)	Thailand	Prachin Buri	Ex	clay	4.8	30	MD	safe AWD	DS	2015	AWDS S2	3	13.7	5.9	9.7	6.2	0.708029	1.09	1.3	0.21	0.08	0.192661	0.791	0.545	0.391	0.199	0.494311	4.97	0.04	4.11	0.72	0.826962
Chidthaisong et al. (2018)	Thailand	Prachin Buri	Ex	clay	4.8	30	MD	safe AWD	DS	2016	AWDS S3	3	1.7	0.8	2.2	1.3	1.29412	0.19	0.09	0.35	0.21	1.84211	0.115	0.036	0.18	0.098	1.56522	3.67	0.27	2.48	0.22	0.675749
Chidthaisong et al. (2018)	Thailand	Prachin Buri	Ex	clay	4.8	30	MD	safe AWD	WS	2014	AWD S1	3	13	15.6	3.4	2.7	0.261538	5.43	2.12	4.47	1.08	0.823204	2.06	1.126	1.446	0.343	0.701942	3.34	0.58	4.19	0.86	1.25449
Chidthaisong et al. (2018)	Thailand	Prachin Buri	Ex	clay	4.8	30	MD	safe AWD	WS	2016	AWD S3	3	33.1	17.1	21.1	6.3	0.637462	0.22	0.1	0.21	0.04	0.954545	1.19	0.613	0.78	0.215	0.655462	5.22	0.68	4.33	0.72	0.829502
Chidthaisong et al. (2018)	Thailand	Prachin Buri	Ex	clay	4.8	30	MD	safe AWD	WS	2014	AWDS S1	3	13	15.6	5.9	3.8	0.453846	5.43	2.12	4.61	0.8	0.848987	2.06	1.126	1.574	0.22	0.764078	3.34	0.58	4.47	0.45	1.33832
Chidthaisong et al. (2018)	Thailand	Prachin Buri	Ex	clay	4.8	30	MD	safe AWD	WS	2016	AWDS S3	3	33.1	17.1	63.4	13	1.91541	0.22	0.1	0.14	0.03	0.636364	1.19	0.613	2.196	0.434	1.84538	5.22	0.68	5.79	0.92	1.1092
Setyanto et al. (2018)	Indonesia	Jakenan, Pati, Central Java	Ex	clay loam	5.04	5.3	MD	safe AWD	DS	2014	AWD S1	3	299	119	167	73	0.558528	1.48	0.56	1.24	0.22	0.837838	10.62	3.97	6.05	2.55	0.56968	5.7	0.5	5.77	0.35	1.01228
Setyanto et al. (2018)	Indonesia	Jakenan, Pati, Central Java	Ex	clay loam	5.04	5.3	MD	safe AWD	DS	2015	AWD S2	3	432	118	303	87	0.701389	0.49	0.27	0.63	0.16	1.28571	14.83	3.97	10.49	2.96	0.70735	4.73	0.24	4.94	0.43	1.0444
Setyanto et al. (2018)	Indonesia	Jakenan, Pati, Central Java	Ex	clay loam	5.04	5.3	MD	safe AWD	DS	2016	AWD S3	3	425	41	260	18	0.611765	0.46	0.23	0.26	0.12	0.565217	14.57	1.41	8.91	0.57	0.611531	4.94	0.15	4.89	0.3	0.989879
Setyanto et al. (2018)	Indonesia	Jakenan, Pati, Central Java	Ex	clay loam	5.04	5.3	MD	safe AWD	DS	2014	AWDS S1	3	299	119	253	36	0.846154	1.48	0.56	1.39	0.04	0.939189	10.62	3.97	9.02	1.22	0.849341	5.7	0.5	5.6	0.04	0.982456
Setyanto et al. (2018)	Indonesia	Jakenan, Pati, Central Java	Ex	clay loam	5.04	5.3	MD	safe AWD	DS	2015	AWDS S2	3	432	118	236	65	0.546296	0.49	0.27	0.36	0.06	0.734694	14.83	3.97	8.13	2.2	0.548213	4.73	0.24	4.32	0.08	0.913319
Setyanto et al. (2018)	Indonesia	Jakenan, Pati, Central Java	Ex	clay loam	5.04	5.3	MD	safe AWD	DS	2016	AWDS S3	3	425	41	244	49	0.574118	0.46	0.23	0.33	0.28	0.717391	14.57	1.41	8.39	1.58	0.575841	4.94	0.15	4.97	0.1	1.00607
Setyanto et al. (2018)	Indonesia	Jakenan, Pati, Central Java	Ex	clay loam	5.04	5.3	MD	safe AWD	WS	2014	AWD S1	3	250	88	160	48	0.64	0.99	0.26	1.01	0.11	1.0202	8.78	3.06	5.75	1.63	0.654897	6.81	0.22	6.85	0.53	1.00587
Setyanto et al. (2018)	Indonesia	Jakenan, Pati, Central Java	Ex	clay loam	5.04	5.3	MD	safe AWD	WS	2015	AWD S2	3	597	45	323	26	0.541039	1.6	0.38	2.22	0.32	1.3875	20.79	1.55	11.65	0.92	0.560366	7.26	0.25	6.94	0.68	0.955923
Setyanto et al. (2018)	Indonesia	Jakenan, Pati, Central Java	Ex	clay loam	5.04	5.3	MD	safe AWD	WS	2016	AWD S3	3	699	115	539	147	0.771102	0.8	0.13	0.72	0.13	0.9	24.01	3.93	18.55	5.03	0.772595	6.53	0.42	6.83	0.56	1.04594
Setyanto et al. (2018)	Indonesia	Jakenan, Pati, Central Java	Ex	clay loam	5.04	5.3	MD	safe AWD	WS	2014	AWDS S1	3	250	88	159	31	0.636	0.99	0.26	0.68	0.22	0.686869	8.78	3.06	5.59	1.13	0.636674	6.81	0.22	6.36	0.46	0.933921
Setyanto et al. (2018)	Indonesia	Jakenan, Pati, Central Java	Ex	clay loam	5.04	5.3	MD	safe AWD	WS	2015	AWDS S2	3	597	45	221	35	0.370184	1.6	0.38	2.17	0.14	1.35625	20.79	1.55	8.15	1.19	0.392015	7.26	0.25	6.82	0.81	0.939394
Setyanto et al. (2018)	Indonesia	Jakenan, Pati, Central Java	Ex	clay loam	5.04	5.3	MD	safe AWD	WS	2016	AWDS S3	3	699	115	553	151	0.79113	0.8	0.13	0.81	0.24	1.0125	24.01	3.93	19.04	5.16	0.793003	6.53	0.42	6.81	0.18	1.04288
Sibayan et al. (2018)	Philippines	Muñoz, Nueva Ecija	Ex	clay	7	14	MD	safe AWD	DS	2014	AWD S1	4	32	22	6	2	0.1875	1.97	1.67	3.92	2.29	1.98985	1.68	0.69	1.36	0.64	0.809524	7.82	0.5	7.34	0.8	0.938619
Sibayan et al. (2018)	Philippines	Muñoz, Nueva Ecija	Ex	clay	7	14	MD	safe AWD	DS	2015	AWD S2	4	71	9	78	22	1.09859	1.58	0.26	2.87	1.35	1.81646	2.89	0.27	3.5	0.57	1.21107	6.56	0.71	6.85	0.59	1.04421
Sibayan et al. (2018)	Philippines	Muñoz, Nueva Ecija	Ex	clay	7	14	MD	safe AWD	DS	2016	AWD S3	4	106	35	43	2	0.40566	1.25	0.6	3.71	1.66	2.968	3.99	1.3	2.56	0.44	0.641604	6.32	0.46	6.46	0.62	1.02215
Sibayan et al. (2018)	Philippines	Muñoz, Nueva Ecija	Ex	clay	7	14	MD	safe AWD	DS	2014	AWDS S1	4	32	22	26	10	0.8125	1.97	1.67	1.05	0.63	0.532995	1.68	0.69	1.18	0.4	0.702381	7.82	0.5	7.96	1	1.0179
Sibayan et al. (2018)	Philippines	Muñoz, Nueva Ecija	Ex	clay	7	14	MD	safe AWD	DS	2015	AWDS S2	4	71	9	78	34	1.09859	1.58	0.26	2.62	0.93	1.65823	2.89	0.27	3.44	1.13	1.19031	6.56	0.71	6.73	1.68	1.02591
Sibayan et al. (2018)	Philippines	Muñoz, Nueva Ecija	Ex	clay	7	14	MD	safe AWD	DS	2016	AWDS S3	4	106	35	55	31	0.518868	1.25	0.6	4.21	1.54	3.368	3.99	1.3	3.11	1.32	0.779449	6.32	0.46	6.01	1.04	0.950949
Sibayan et al. (2018)	Philippines	Muñoz, Nueva Ecija	Ex	clay	7	14	MD	safe AWD	WS	2014	AWD S1	4	437	45	581	99	1.32952	0.37	0.22	0.54	0.17	1.45946	14.98	1.54	19.91	3.42	1.32911	5.2	0.29	5.42	0.4	1.04231
Sibayan et al. (2018)	Philippines	Muñoz, Nueva Ecija	Ex	clay	7	14	MD	safe AWD	WS	2015	AWD S2	4	328	58	264	138	0.804878	0.78	0.37	0.74	0.58	0.948718	11.4	2.06	9.21	4.53	0.807895	5.67	0.26	6.09	0.52	1.07407
Sibayan et al. (2018)	Philippines	Muñoz, Nueva Ecija	Ex	clay	7	14	MD	safe AWD	WS	2016	AWD S3	4	221	64	205	34	0.927602	0.37	0.37	0.62	0.34	1.67568	7.63	2.19	7.17	1.21	0.939712	5.36	0.35	5.98	0.63	1.11567
Sibayan et al. (2018)	Philippines	Muñoz, Nueva Ecija	Ex	clay	7	14	MD	safe AWD	WS	2014	AWDS S1	4	437	45	533	128	1.21968	0.37	0.22	0.47	0.41	1.27027	14.98	1.54	18.27	4.35	1.21963	5.2	0.29	4.81	0.27	0.925
Sibayan et al. (2018)	Philippines	Muñoz, Nueva Ecija	Ex	clay	7	14	MD	safe AWD	WS	2015	AWDS S2	4	328	58	369	97	1.125	0.78	0.37	0.66	0.32	0.846154	11.4	2.06	12.76	3.34	1.1193	5.67	0.26	5.84	0.57	1.02998
Sibayan et al. (2018)	Philippines	Muñoz, Nueva Ecija	Ex	clay	7	14	MD	safe AWD	WS	2016	AWDS S3	4	221	64	219	34	0.99095	0.37	0.37	0.45	0.28	1.21622	7.63	2.19	7.6	1.14	0.996068	5.36	0.35	5.63	0.47	1.05037
Tran et al. (2018)	Vietnam	Thua Thien Hue Province	F	loam	4.18	19.2	MD	safe AWD	DS	2014	AWD S1	3	511	17	395	47	0.772994	0.287	0.338	0.363	0.112	1.26481	17.47	0.506	13.54	1.61	0.775043	5.51	0.34	5.51	0.32	1
Tran et al. (2018)	Vietnam	Thua Thien Hue Province	F	loam	4.18	19.2	MD	safe AWD	DS	2015	AWD S2	3	485	184	299	94	0.616495	0.275	0.433	0.053	0.024	0.192727	16.586	6.12	10.19	3.186	0.614374	4.45	0.57	4.49	0.11	1.00899
Tran et al. (2018)	Vietnam	Thua Thien Hue Province	F	loam	4.18	19.2	MD	safe AWD	DS	2016	AWD S3	3	502	251	357	219	0.711155	2.315	0.452	5.119	0.591	2.21123	17.747	8.63	13.67	7.38	0.770271	3.27	0.25	4.68	0.44	1.43119
Tran et al. (2018)	Vietnam	Thua Thien Hue Province	F	loam	4.18	19.2	MD	safe AWD	DS	2014	AWDS S1	3	511	17	429	19	0.83953	0.287	0.338	0.297	0.271	1.03484	17.47	0.506	14.69	0.6	0.84087	5.51	0.34	5.8	0.34	1.05263
Tran et al. (2018)	Vietnam	Thua Thien Hue Province	F	loam	4.18	19.2	MD	safe AWD	DS	2015	AWDS S2	3	485	184	255	90	0.525773	0.275	0.433	0.115	0.175	0.418182	16.586	6.12	8.72	3.036	0.525745	4.45	0.57	4.41	0.14	0.991011
Tran et al. (2018)	Vietnam	Thua Thien Hue Province	F	loam	4.18	19.2	MD	safe AWD	DS	2016	AWDS S3	3	502	251	374	160	0.74502	2.315	0.452	2.453	0.822	1.05961	17.747	8.63	13.454	5.625	0.7581	3.27	0.25	4.3	0.48	1.31498
Tran et al. (2018)	Vietnam	Thua Thien Hue Province	F	loam	4.18	19.2	MD	safe AWD	WS	2014	AWD S1	3	1029	152	815	334	0.792031	1.047	0.961	0.707	0.531	0.675263	35.305	5.396	27.915	11.467	0.790681	4.69	0.4	4.55	0.36	0.970149
Tran et al. (2018)	Vietnam	Thua Thien Hue Province	F	loam	4.18	19.2	MD	safe AWD	WS	2015	AWD S2	3	343	136	245	99	0.714286	0.349	0.356	0.441	0.14	1.26361	11.775	4.542	8.456	1.99	0.718132	5.34	0.21	5.36	0.45	1.00375
Tran et al. (2018)	Vietnam	Thua Thien Hue Province	F	loam	4.18	19.2	MD	safe AWD	WS	2016	AWD S3	3	560	153	413	182	0.7375	1.14	0.283	2.351	2.102	2.06228	19.382	5.189	14.754	5.775	0.761222	3.28	0.33	4.1	0.5	1.25
Tran et al. (2018)	Vietnam	Thua Thien Hue Province	F	loam	4.18	19.2	MD	safe AWD	WS	2014	AWDS S1	3	1029	152	810	177	0.787172	1.047	0.961	0.567	0.474	0.541547	35.305	5.396	27.698	6.096	0.784535	4.69	0.4	4.36	0.41	0.929638
Tran et al. (2018)	Vietnam	Thua Thien Hue Province	F	loam	4.18	19.2	MD	safe AWD	WS	2015	AWDS S2	3	343	136	196	35	0.571429	0.349	0.356	0.344	0.255	0.985673	11.775	4.542	6.756	1.178	0.573758	5.34	0.21	5.78	0.87	1.0824
Tran et al. (2018)	Vietnam	Thua Thien Hue Province	F	loam	4.18	19.2	MD	safe AWD	WS	2016	AWDS S3	3	560	153	464	88	0.828571	1.14	0.283	2.569	0.371	2.25351	19.382	5.189	16.532	3.119	0.852956	3.28	0.33	3.67	0.81	1.1189
*1 Ex: experimental field; F: farmer's field
*2 pH values in italic were measured with KCl, others with water
*3 SD: single drainage; MD: multiple drainage; AWD: alternate wetting and drying
information in red color was collected by inquiring directly to the authors
information in blue color was omitted due to large uncertainty

## Sheet: Sup_Table 2
Supplementary Table 2. Experimental data set for biochar option
Reference	Country	Site	Field type*1	Soil			Applied biochar		Water management*3	Season	Year	Treatment	Number of replecation	CH4 EF (kg/ha)					N2O EF (kg/ha)					netGWP EF (Mg/ha)					Rice yield (Mg/ha)					Note
				Texture	pH*2	SOC (g C/kg)	Source	Preparation						Mean- control	SD- control	Mean-option	SD- option	Effect size	Mean- control	SD- control	Mean-option	SD- option	Effect size	Mean- control	SD- control	Mean-option	SD- option	Effect size	Mean- control	SD- control	Mean-option	SD- option	Effect size
Pandey et al. (2014)	Vietnam	Hanoi		silt loam	5.7	12.55	rice straw	500C, 4 hr	safe AWD	DS	2013	in AWD with swine manure	3	105	13	46	5	0.438095	0.97	0.12	0.67	0.06	0.690722	3.85906	0.47776	1.76366	0.18788	0.457018	5.35	0.17	4.95	0.36	0.925234
Pandey et al. (2014)	Vietnam	Hanoi		silt loam	5.7	12.55	rice straw	500C, 4 hr	safe AWD	DS	2013	in CF with swine manure	3	353	7	140	8	0.396601	0.44	0.03	0.27	0.01	0.613636	12.1331	0.24694	4.84046	0.27498	0.398946	6.02	0.29	5.42	0.31	0.900332
Vu et al. (2015)	Vietnam	Bac Giang Province	Ex	silt loam	5.3	7.5	rice straw		SD	WS	2011	summer season with digestate	4	163	24	156	40	0.957055											4.97	0.15	5.22	0.13	1.0503	rice-maize-rice rotation in a year
Vu et al. (2015)	Vietnam	Bac Giang Province	Ex	silt loam	5.3	7.5	rice straw		CF	DS	2012	spring seasonwith digestate	4	73	22	44	10	0.60274											5.15	0.31	6.07	0.11	1.17864	rice-maize-rice rotation in a year
Thammasom et al. (2016)	Thailand	Khon Kaen Province	F	loam	5	7.1	eucalypt branches	350C, 48 hr		DS	2011/2012	6.25 t/ha	4	170		170		1											2.46		3.47		1.41057
Thammasom et al. (2016)	Thailand	Khon Kaen Province	F	loam	5	7.1	eucalypt branches	350C, 48 hr		DS	2011/2012	12.5 t/ha	4	170		180		1.05882											2.46		4.03		1.63821
Thammasom et al. (2016)	Thailand	Khon Kaen Province	F	loam	5	7.1	eucalypt branches	350C, 48 hr		DS	2011/2012	18.75 t/ha	4	170		220		1.29412											2.46		4.55		1.84959
Thammasom et al. (2016)	Thailand	Khon Kaen Province	F	loam	5	7.1	eucalypt branches	350C, 48 hr		DS	2011/2012	25 t/ha	4	170		140		0.823529											2.46		6.05		2.45935
Thu et al. (2016)	Vietnam	Hanoi		silt loam	5.07	26.2	rice straw		CF	WS	2012	CF	3	459.83		272.11		0.591762	1.872		1.704		0.910256	16.1921		9.75953		0.602735	3.53		3.81		1.07932
Thu et al. (2016)	Vietnam	Hanoi		silt loam	5.07	26.2	rice straw		safe AWD	WS	2012	AWD	3	288.46		237.32		0.822714	2.53		1.73		0.683794	10.5616		8.58442		0.812797	3.52		3.57		1.0142
Trinh et al. (2017)	Vietnam	Thinh Long Commune,northern Vietnam	F		4.8	9	rice straw			WS	2014	control	4	694.667		622.667		0.896353	1.71286		1.24771		0.72844	24.1291		21.5425		0.892801
Trinh et al. (2017)	Vietnam	Thinh Long Commune,northern Vietnam	F		4.8	9	rice straw			WS	2014	1/2 NPK	4	758.667		794.667		1.04745	2.16543		1.55571		0.718433	26.44		27.4823		1.03942
Trinh et al. (2017)	Vietnam	Thinh Long Commune,northern Vietnam	F		4.8	9	rice straw			WS	2014	NPK	4	922.667		990.667		1.0737	2.94486		1.90143		0.645678	32.2482		34.2493		1.06205
Trinh et al. (2017)	Vietnam	Thinh Long Commune,northern Vietnam	F		4.8	9	rice straw			WS	2014	NPK+COMP	4	1181.33		1073.33		0.908578	1.79143		1.85743		1.03684	40.6992		37.0468		0.91026
Trinh et al. (2017)	Vietnam	Rang Dong Commune,northern Vietnam	F		5.9	4	rice straw			WS	2014	control	4	545.333		521.333		0.95599	1.61229		1.78829		1.10916	19.0218		18.2582		0.959859
Trinh et al. (2017)	Vietnam	Rang Dong Commune,northern Vietnam	F		5.9	4	rice straw			WS	2014	1/2 NPK	4	676		761.333		1.12623	1.87		3.23714		1.73109	23.5413		26.85		1.14055
Trinh et al. (2017)	Vietnam	Rang Dong Commune,northern Vietnam	F		5.9	4	rice straw			WS	2014	NPK	4	901.333		994.667		1.10355	2.47657		2.552		1.03046	31.3834		34.5792		1.10183
Trinh et al. (2017)	Vietnam	Rang Dong Commune,northern Vietnam	F		5.9	4	rice straw			WS	2014	NPK+COMP	4	1192		1014.67		0.85123	2.45457		3.09571		1.2612	41.2595		35.4212		0.858499
*1 Ex: experimental field; F: farmer's field
*2 pH values in italic were measured with KCl, others with water
*3 SD: single drainage; MD: multiple drainage; AWD: alternate wetting and drying

## Sheet: Sup_Table 3
Supplementary Table 3. Experimental data set for organic matter management option
Reference	Country	Site	Field type*1	Soil			Mitigation option			Baseline treatment	Water management*3	Season	Year	Number of replecation	CH4 EF (kg/ha)					N2O EF (kg/ha)					netGWP EF (Mg/ha)					Rice yield (Mg/ha)					Note
				Texture	pH*2	SOC (g C/kg)	Category	Type	Application rate						Mean- control	SD- control	Mean-option	SD- option	Effect size	Mean- control	SD- control	Mean-option	SD- option	Effect size	Mean- control	SD- control	Mean-option	SD- option	Effect size	Mean- control	SD- control	Mean-option	SD- option	Effect size
Wassmann et al. (2000)	Philippines	Los Baños	Ex	silty clay	6.6	12	organic matter	rice straw removal		rice straw incorporation	CF	WS	1996	3	40		14		0.35											3		3.5		1.16667	measured by an automated chamber system
Sander et al (2014)	Philippines	Los Baños	Ex	silty clay	6.6	18	organic matter	rice straw removal		rice straw incorporation		WS	2011	4	550		260		0.472727	0.23		0.49		2.13043	18.7685		8.98602		0.478781	5.1		5.6		1.09804	mean values for 4 fallow management treatments
Sander et al (2014)	Philippines	Los Baños	Ex	silty clay	6.6	18	organic matter	rice straw removal		rice straw incorporation		DS	2012	4	330		170		0.515152	0.21		0.71		3.38095	11.2826		5.99158		0.531047	6.725		6.925		1.02974	mean values for 4 fallow management treatments
Wassmann et al. (2000)	Philippines	Los Baños	Ex	silty clay	6.6	12	organic matter	rice straw application	60 kg N/ha	no rice straw application	MD	DS	1997	3	27		634		23.4815											5.4		3.5		0.648148	measured by an automated chamber system
Wassmann et al. (2000)	Philippines	Los Baños	Ex	silty clay	6.6	12	organic matter	rice straw application	60 kg N/ha	no rice straw application	MD	WS	1997	3	13		602		46.3077											3		3		1	measured by an automated chamber system
Bronson et al. (1997)	Philippines	Los Baños	Ex	clay	6.4	16.9	organic matter	rice straw application	5.5 Mg/ha	no rice straw application	SD	DS	1993	3	10.6667		222.667		20.875	0.139857		0.0895714		0.640449	0.404344		7.59736		18.7893	6.2		5.7		0.919355	measured by an automated chamber system
Bronson et al. (1997)	Philippines	Los Baños	Ex	clay	6.4	16.9	organic matter	rice straw application	5.5 Mg/ha	no rice straw application	CF	WS	1993	3	36		390.667		10.8519	0.205857		0.0927143		0.450382	1.28535		13.3103		10.3554	5.4		4.7		0.87037	measured by an automated chamber system
Bronson et al. (1997)	Philippines	Los Baños	Ex	clay	6.4	16.9	organic matter	rice straw application	5.5 Mg/ha	no rice straw application	CF	DS	1994	3	17.3333		370.667		21.3846	0.407		0.044		0.108108	0.710619		12.6158		17.7532	6		5.9		0.983333	measured by an automated chamber system
Bronson et al. (1997)	Philippines	Los Baños	Ex	clay	6.4	16.9	organic matter	rice straw application	5.5 Mg/ha	no rice straw application	SD	DS	1994	3	6.66667		212		31.8	1.00257		0.259286		0.258621	0.525433		7.28527		13.8653	6.1		5.3		0.868852	measured by an automated chamber system
Corton et al. (2000)	Philippines	Maligaya, Muñoz, Nueva Ecija	Ex	silty clay	6.88	13.2	organic matter	rice straw application	4.0 Mg/ha	no rice straw application	CF	DS	1996	3	160		420		2.625											7.3		7.13		0.976712	measured by an automated chamber system
Corton et al. (2000)	Philippines	Maligaya, Muñoz, Nueva Ecija	Ex	silty clay	6.88	13.2	organic matter	rice straw application	4.0 Mg/ha	no rice straw application	CF	WS	1996	3	272		952		3.5											5.17		5.12		0.990329	measured by an automated chamber system
Setyanto et al. (2000)	Indonesia	Jakenan, Central Java	Ex	silty clay	4.7	4.8	organic matter	rice straw application	42 kg N/ha	no rice straw application	rain fed	WS	1995/1996	3	56		78		1.39286											4.8		5.3		1.10417	measured by an automated chamber system
Setyanto et al. (2000)	Indonesia	Jakenan, Central Java	Ex	silty clay	4.7	4.8	organic matter	rice straw application	41 kg N/ha	no rice straw application	rain fed	DS	1996	3	53		73		1.37736											4.4		4.6		1.04545	measured by an automated chamber system
Thammasom et al. (2016)	Thailand	Khon Kaen Province	F	loam	5	7.1	organic matter	rice straw application	6.25 Mg/ha	no rice straw application		DS	2011/2012	4	170		290		1.70588											2.46		2.95		1.19919
Thammasom et al. (2016)	Thailand	Khon Kaen Province	F	loam	5	7.1	organic matter	rice straw application	12.50 Mg/ha	no rice straw application		DS	2011/2012	4	170		490		2.88235											2.46		4.02		1.63415
Thammasom et al. (2016)	Thailand	Khon Kaen Province	F	loam	5	7.1	organic matter	rice straw application	18.75 Mg/ha	no rice straw application		DS	2011/2012	4	170		620		3.64706											2.46		4.12		1.6748
Thammasom et al. (2016)	Thailand	Khon Kaen Province	F	loam	5	7.1	organic matter	rice straw application	25.00 Mg/ha	no rice straw application		DS	2011/2012	4	170		700		4.11765											2.46		4.74		1.92683
Tariq et al. (2017)	Vietnam	EWM site, Hai Duong province	F	loam	5.14	9.11	organic matter	reduced rice straw application	4.0 Mg/ha	full rice straw application (5.5 Mg/ha)	SD	DS	2013	3	92.1	93.5307	90.7	69.282	0.984799	1.2	0.519615	1.3	0.69282	1.08333	3.489		3.4712		0.994898	5.56	0.31	5.35	0.37	0.96223
Tariq et al. (2017)	Vietnam	EWM site, Hai Duong province	F	loam	5.14	9.11	organic matter	reduced rice straw application	4.0 Mg/ha	full rice straw application (5.5 Mg/ha)	MD	DS	2013	3	107.2	51.9615	59.1	22.5167	0.551306	1.8	0.519615	1.7	1.21244	0.944444	4.1812		2.516		0.601741	5.48	0.78	5.18	0.27	0.945255
Tariq et al. (2017)	Vietnam	EWM site, Hai Duong province	F	loam	5.14	9.11	organic matter	reduced rice straw application	4.0 Mg/ha	full rice straw application (5.5 Mg/ha)	MD	DS	2013	3	36.1	27.7128	34.6	8.66025	0.958449	2	0.69282	2	0.69282	1	1.8234		1.7724		0.97203	5.94	0.18	5.54	0.03	0.93266
Tariq et al. (2017)	Vietnam	IWM site, Hai Duong province	F	loam	5.16	13	organic matter	reduced rice straw application	3.5 Mg/ha	full rice straw application (5.5 Mg/ha)	SD	DS	2013	3	88.4	13.8564	108.6	20.7846	1.22851	0.7	0.34641	0.4	0.519615	0.571429	3.2142		3.8116		1.18586	4.5	0.51	4.89	0.56	1.08667
Tariq et al. (2017)	Vietnam	IWM site, Hai Duong province	F	loam	5.16	13	organic matter	reduced rice straw application	3.5 Mg/ha	full rice straw application (5.5 Mg/ha)	MD	DS	2013	3	154.3	83.1384	98.4	12.1244	0.637719	1.4	0.866025	1.3	0.173205	0.928571	5.6634		3.733		0.659145	5.32	0.19	5.25	0.38	0.986842
Tariq et al. (2017)	Vietnam	IWM site, Hai Duong province	F	loam	5.16	13	organic matter	reduced rice straw application	3.5 Mg/ha	full rice straw application (5.5 Mg/ha)	MD	DS	2013	3	134.9	93.5307	123.9	46.7654	0.918458	0.7	0.519615	1.1	0.34641	1.57143	4.7952		4.5404		0.946864	4.47	0.34	4.2	0.04	0.939597
Tariq et al. (2017)	Vietnam	EWM site, Hai Duong province	F	loam	5.14	9.11	organic matter	reduced rice straw application	4.0 Mg/ha	full rice straw application (5.5 Mg/ha)	SD	WS	2013	3	486.5	226.899	252.3	119.512	0.518602	0.1	0	0.5	0.69282	5	16.5708		8.7272		0.526661	4.67	0.06	5.47	0.08	1.17131
Tariq et al. (2017)	Vietnam	EWM site, Hai Duong province	F	loam	5.14	9.11	organic matter	reduced rice straw application	4.0 Mg/ha	full rice straw application (5.5 Mg/ha)	MD	WS	2013	3	627.4	166.277	328.9	119.512	0.524227	0.7	0.34641	0.5	0.69282	0.714286	21.5402		11.3316		0.526068	5.14	0.31	4.23	0.55	0.822957
Tariq et al. (2017)	Vietnam	EWM site, Hai Duong province	F	loam	5.14	9.11	organic matter	reduced rice straw application	4.0 Mg/ha	full rice straw application (5.5 Mg/ha)	MD	WS	2013	3	222.6	110.851	236.6	62.3538	1.06289	0.6	0.34641	0.4	0.173205	0.666667	7.7472		8.1636		1.05375	4.82	0.46	4.93	0.4	1.02282
Tariq et al. (2017)	Vietnam	IWM site, Hai Duong province	F	loam	5.16	13	organic matter	reduced rice straw application	4.0 Mg/ha	full rice straw application (5.5 Mg/ha)	SD	WS	2013	3	447.5	1.5242	148.4	34.641	0.33162	0.7	0.69282	0.8	1.03923	1.14286	15.4236		5.284		0.342592	3.98	0.12	3.82	0.24	0.959799
Tariq et al. (2017)	Vietnam	IWM site, Hai Duong province	F	loam	5.16	13	organic matter	reduced rice straw application	4.0 Mg/ha	full rice straw application (5.5 Mg/ha)	MD	WS	2013	3	472.8	218.238	379.5	15.5885	0.802665	0.5	0.69282	0.7	0.519615	1.4	16.2242		13.1116		0.808151	4.22	0.26	4.36	0.49	1.03318
Tariq et al. (2017)	Vietnam	IWM site, Hai Duong province	F	loam	5.16	13	organic matter	reduced rice straw application	4.0 Mg/ha	full rice straw application (5.5 Mg/ha)	MD	WS	2013	3	448.1	62.3538	355.8	103.923	0.794019	0.7	0.34641	0.5	0.34641	0.714286	15.444		12.2462		0.792942	3.98	0.25	4.18	0.01	1.05025
Jiaphasuanan and Towprayoon (2014)	Thailand	Samutsakorn	F	clay	5.17	30.5	organic matter	rice straw burning	0.85 Mg/ha	un-burnt (2.95 Mg/ha)	CF	WS	2007	3	227	15	156	9	0.687225	4.5	0.9	5.5	0.3	1.22222	9.059		6.943		0.76642
Jiaphasuanan and Towprayoon (2014)	Thailand	Samutsakorn	F	clay	5.17	30.5	organic matter	rice straw burning	0.85 Mg/ha	un-burnt (2.95 Mg/ha)	SD	WS	2007	3	112	9	144	17	1.28571	4	0.4	4	0.7	1	5		6.088		1.2176
Jiaphasuanan and Towprayoon (2014)	Thailand	Samutsakorn	F	clay	5.17	30.5	organic matter	rice straw burning	0.85 Mg/ha	un-burnt (2.95 Mg/ha)	CF	DS	2007	3	167	48	68	10	0.407186	5.3	0.2	8.9	0.7	1.67925	7.2574		4.9642		0.684019
Jiaphasuanan and Towprayoon (2014)	Thailand	Samutsakorn	F	clay	5.17	30.5	organic matter	rice straw burning	0.85 Mg/ha	un-burnt (2.95 Mg/ha)	SD	DS	2007	3	128	6	66	8	0.515625	6.4	0.4	7.6	1.6	1.1875	6.2592		4.5088		0.720348
Chareonsilp et al. (2000)	Thailand	Prachinburi	Ex		3.93	19.3	organic matter	rice straw burning		rice straw incorporation (12.5 Mg/ha)	deep water	WS	1996	3	619		69		0.11147											3.6		2.91		0.808333	measured by an automated chamber system
Chareonsilp et al. (2000)	Thailand	Prachinburi	Ex		3.93	19.3	organic matter	rice straw mulching		rice straw incorporation (12.5 Mg/ha)	deep water	WS	1996	3	619		127		0.20517											3.6		2.82		0.783333	measured by an automated chamber system
Corton et al. (2000)	Philippines	Maligaya, Muñoz, Nueva Ecija	Ex	silty clay	6.88	13.2	organic matter	rice straw compost application	2.5 Mg/ha	rice straw application	CF	DS	1996	3	420		178		0.42381											7.13		7.41		1.03927	measured by an automated chamber system
Corton et al. (2000)	Philippines	Maligaya, Muñoz, Nueva Ecija	Ex	silty clay	6.88	13.2	organic matter	rice straw compost application	2.5 Mg/ha	rice straw application	CF	WS	1996	3	952		353		0.370798											5.12		5.35		1.04492	measured by an automated chamber system
Setyanto et al. (2000)	Indonesia	Jakenan, Central Java	Ex	silty clay	4.7	4.8	organic matter	farmyard manure application	11 kg N/ha	urea control	rain fed	WS	1994/1995	3	74		65		0.878378											4.9		4.1		0.836735	measured by an automated chamber system
Setyanto et al. (2000)	Indonesia	Jakenan, Central Java	Ex	silty clay	4.7	4.8	organic matter	farmyard manure application	22 kg N/ha	urea control	rain fed	WS	1994/1995	3	74		69		0.932432											4.9		5.1		1.04082	measured by an automated chamber system
Setyanto et al. (2000)	Indonesia	Jakenan, Central Java	Ex	silty clay	4.7	4.8	organic matter	farmyard manure application	11 kg N/ha	urea control	rain fed	DS	1995	3																3.4		3.3		0.970588	measured by an automated chamber system
Setyanto et al. (2000)	Indonesia	Jakenan, Central Java	Ex	silty clay	4.7	4.8	organic matter	farmyard manure application	22 kg N/ha	urea control	rain fed	DS	1995	3																3.4		2.9		0.852941	measured by an automated chamber system
Setyanto et al. (2000)	Indonesia	Jakenan, Central Java	Ex	silty clay	4.7	4.8	organic matter	farmyard manure application	11 kg N/ha	urea control	rain fed	WS	1995/1996	3	56		56		1											4.8		4.9		1.02083	measured by an automated chamber system
Setyanto et al. (2000)	Indonesia	Jakenan, Central Java	Ex	silty clay	4.7	4.8	organic matter	farmyard manure application	11 kg N/ha	urea control	rain fed	DS	1996	3	53		92		1.73585											4.4		4.5		1.02273	measured by an automated chamber system
Ly et al. (2013)	Cambodia	Tramkak, Takeo	F	sandy	4.05	2.87	organic matter	farmyard manure application	10 Mg/ha	no-fertilizer control	CF	WS	2011	3	154.769	22.7558	226.382	50.0984	1.4627											2.6		3.03		1.16538
Ly et al. (2013)	Cambodia	Tramkak, Takeo	F	sandy	4.05	2.87	organic matter	farmyard manure application	10 Mg/ha	no-fertilizer control	MD	WS	2011	3	154.693	91.43	177.631	65.8392	1.14828											2.27		2.98		1.31278
Ly et al. (2013)	Cambodia	Tramkak, Takeo	F	sandy	4.05	2.87	organic matter	farmyard manure application	10 Mg/ha	mineral fertilizer control	CF	WS	2011	3	194.89	65.2562	282.097	80.9804	1.44747											5		5.45		1.09
Ly et al. (2013)	Cambodia	Tramkak, Takeo	F	sandy	4.05	2.87	organic matter	farmyard manure application	10 Mg/ha	mineral fertilizer control	MD	WS	2011	3	169.455	37.4826	212.983	90.8142	1.25687											4.56		5.21		1.14254
Ly et al. (2013)	Cambodia	Tramkak, Takeo	F	sandy	4.05	2.87	organic matter	farmyard manure application without mineral fertilizer	10 Mg/ha	mineral fertilizer control	CF	WS	2011	3	194.89	65.2562	226.382	50.0984	1.16158											5		3.03		0.606
Ly et al. (2013)	Cambodia	Tramkak, Takeo	F	sandy	4.05	2.87	organic matter	farmyard manure application without mineral fertilizer	10 Mg/ha	mineral fertilizer control	MD	WS	2011	3	169.455	37.4826	177.631	65.8392	1.04825											4.56		2.98		0.653509
Pandey et al. (2014)	Vietnam	Hanoi		silt loam	5.7	12.55	organic matter	farmyard manure application	10 Mg/ha	mineral fertilizer control	MD	DS	2013	3	31	8	105	13	3.3871	0.74	0.06	0.97	0.12	1.31081	1.27452		3.85906		3.02785	5.25	0.7	5.35	0.17	1.01905
Pandey et al. (2014)	Vietnam	Hanoi		silt loam	5.7	12.55	organic matter	rice straw compost application	11.21 Mg/ha	mineral fertilizer control	MD	DS	2013	3	31	8	79	11	2.54839	0.74	0.06	0.78	0.04	1.05405	1.27452		2.91844		2.28983	5.25	0.7	5.48	0.9	1.04381
Pandey et al. (2014)	Vietnam	Hanoi		silt loam	5.7	12.55	organic matter	farmyard manure application	10 Mg/ha	mineral fertilizer control	CF	DS	2013	3	108	12	353	7	3.26852	0.31	0.01	0.44	0.03	1.41935	3.76438		12.1331		3.22314	5.57	0.86	6.02	0.29	1.08079
Pandey et al. (2014)	Vietnam	Hanoi		silt loam	5.7	12.55	organic matter	rice straw compost application	11.21 Mg/ha	mineral fertilizer control	CF	DS	2013	3	108	12	252	61	2.33333	0.31	0.01	0.42	0.01	1.35484	3.76438		8.69316		2.30932	5.57	0.86	5.33	0.1	0.956912
Thu et al. (2016)	Vietnam	Hanoi		silt loam	5.07	26.2	organic matter	rice straw compost application	1 Mg C/ha	mineral fertilizer control	CF	WS	2012	3	459.83		546.07		1.18755	1.872		3.258		1.74038	16.1921		19.5373		1.20659	3.53		3.85		1.09065
Thu et al. (2016)	Vietnam	Hanoi		silt loam	5.07	26.2	organic matter	farmyard manure application	1 Mg C/ha	mineral fertilizer control	CF	WS	2012	3	459.83		693.66		1.50851	1.872		3.499		1.86912	16.1921		24.6271		1.52094	3.53		4.74		1.34278
Thu et al. (2016)	Vietnam	Hanoi		silt loam	5.07	26.2	organic matter	rice straw compost application	1 Mg C/ha	mineral fertilizer control	MD	WS	2012	3	288.46		369.79		1.28195	2.53		3.83		1.51383	10.5616		13.7142		1.2985	3.52		3.73		1.05966
Thu et al. (2016)	Vietnam	Hanoi		silt loam	5.07	26.2	organic matter	farmyard manure application	1 Mg C/ha	mineral fertilizer control	MD	WS	2012	3	288.46		545.16		1.8899	2.53		4.12		1.62846	10.5616		19.7632		1.87124	3.52		4.49		1.27557
Vu et al. (2015)	Vietnam	Bac Giang Province	Ex	silt loam	5.3	7.5	organic matter	composted manure application	6.7 Mg/ha (39 kg N/ha)	fresh manure application	SD	WS	2011	4	287	18	217	16	0.756098											4.93	0.06	4.94	0.17	1.00203	rice-maize-rice rotation in a year
Vu et al. (2015)	Vietnam	Bac Giang Province	Ex	silt loam	5.3	7.5	organic matter	composted manure application	6.7 Mg/ha (39 kg N/ha)	fresh manure application	SD	WS	2011	4	89	6	138	21	1.55056											5.83	0.08	5.9	0.21	1.01201	rice-maize-rice rotation in a year
Vu et al. (2015)	Vietnam	Bac Giang Province	Ex	silt loam	5.3	7.5	organic matter	liquid digestate application	100 m3/ha (65 kg N/ha)	fresh manure application	CF	DS	2012	4	287	18	161	12	0.560976											4.93	0.06	4.97	0.15	1.00811	rice-maize-rice rotation in a year
Vu et al. (2015)	Vietnam	Bac Giang Province	Ex	silt loam	5.3	7.5	organic matter	liquid digestate application	100 m3/ha (65 kg N/ha)	fresh manure application	CF	DS	2012	4	89	6	72	11	0.808989											5.83	0.08	5.15	0.31	0.883362	rice-maize-rice rotation in a year
Trinh et al. (2017)	Vietnam	Thinh Long Commune,northern Vietnam	F		4.8	9	organic matter	farmyard manure application	10 Mg/ha	control		WS	2014	4	694.667		1004		1.4453	0.806143		1.26814		1.5731	23.8589		34.5139		1.44658
Trinh et al. (2017)	Vietnam	Thinh Long Commune,northern Vietnam	F		4.8	9	organic matter	farmyard manure application	10 Mg/ha	1/2 NPK		WS	2014	4	758.667		1112		1.46573	0.935		1.01829		1.08908	26.0733		38.1114		1.4617
Trinh et al. (2017)	Vietnam	Thinh Long Commune,northern Vietnam	F		4.8	9	organic matter	farmyard manure application	10 Mg/ha	NPK		WS	2014	4	922.667		1181.33		1.28035	1.23829		1.22729		0.991117	31.7397		40.5311		1.27698
Trinh et al. (2017)	Vietnam	Rang Dong Commune,northern Vietnam	F		5.9	4	organic matter	farmyard manure application	10 Mg/ha	control		WS	2014	4	545.333		1013.33		1.85819	0.856429		0.847		0.988991	18.7965		34.7057		1.84639
Trinh et al. (2017)	Vietnam	Rang Dong Commune,northern Vietnam	F		5.9	4	organic matter	farmyard manure application	10 Mg/ha	1/2 NPK		WS	2014	4	676		1093.33		1.61736	1.08271		1.078		0.995646	23.3066		37.4946		1.60875
Trinh et al. (2017)	Vietnam	Rang Dong Commune,northern Vietnam	F		5.9	4	organic matter	farmyard manure application	10 Mg/ha	NPK		WS	2014	4	901.333		1192		1.32249	1.474		0.895714		0.607676	31.0846		40.7949		1.31238
*1 Ex: experimental field; F: farmer's field
*2 pH values in italic were measured with KCl, others with water
*3 SD: single drainage; MD: multiple drainage; AWD: alternate wetting and drying
Shaded data indicate mitigation options.

## Sheet: Sup_Table 4
Supplementary Table 4. Experimental data set for fertilizer and other amendments option
Reference	Country	Site	Field type*1	Soil			Mitigation option			Baseline treatment	Water management*3	Season	Year	Number of replecation	CH4 EF (kg/ha)					N2O EF (kg/ha)					netGWP EF (Mg/ha)					Rice yield (Mg/ha)					Note
				Texture	pH*2	SOC (g C/kg)	Category	Type	Application rate						Mean- control	SD- control	Mean-option	SD- option	Effect size	Mean- control	SD- control	Mean-option	SD- option	Effect size	Mean- control	SD- control	Mean-option	SD- option	Effect size	Mean- control	SD- control	Mean-option	SD- option	Effect size
Bronson et al. (1997)	Philippines	Los Baños	Ex	clay	6.4	16.9	fertilizer/amendment	ammonium sulfate	200 kg N/ha	urea	SD	DS	1993	3	10.6667		2.66667		0.25	0.14		0.36		2.57143	0.404387		0.197947		0.489498	6.2		6.3		1.01613	measured by an automated chamber system
Bronson et al. (1997)	Philippines	Los Baños	Ex	clay	6.4	16.9	fertilizer/amendment	ammonium sulfate	120 kg N/ha	urea	CF	WS	1993	3	36		13.3333		0.37037	0.206		0.15		0.728155	1.28539		0.498033		0.387458	5.4		5.7		1.05556	measured by an automated chamber system
Wassmann et al. (2000)	Philippines	Los Baños	Ex	silty clay	6.6	12	fertilizer/amendment	ammonium sulfate	120 kg N/ha (together with urea)	urea	MD	DS	1997	3	27		9		0.333333											5.4		4.6		0.851852	measured by an automated chamber system
Wassmann et al. (2000)	Philippines	Los Baños	Ex	silty clay	6.6	12	fertilizer/amendment	ammonium sulfate	120 kg N/ha (together with urea)	urea	MD	WS	1997	3	13		7		0.538462											3		3.5		1.16667	measured by an automated chamber system
Corton et al. (2000)	Philippines	Maligaya, Muñoz, Nueva Ecija	Ex	silty clay	6.88	13.2	fertilizer/amendment	ammonium sulfate	120 kg N/ha	urea	CF	WS	1994	3	266		230		0.864662											5.22		5.1		0.977011	measured by an automated chamber system
Corton et al. (2000)	Philippines	Maligaya, Muñoz, Nueva Ecija	Ex	silty clay	6.88	13.2	fertilizer/amendment	ammonium sulfate	120 kg N/ha	urea	CF	DS	1995	3	204		184		0.901961											6.54		6.4		0.978593	measured by an automated chamber system
Corton et al. (2000)	Philippines	Maligaya, Muñoz, Nueva Ecija	Ex	silty clay	6.88	13.2	fertilizer/amendment	ammonium sulfate	180 kg N/ha	urea	CF	DS	1995	3	228		145		0.635965											6.45		6.34		0.982946	measured by an automated chamber system
Corton et al. (2000)	Philippines	Maligaya, Muñoz, Nueva Ecija	Ex	silty clay	6.88	13.2	fertilizer/amendment	ammonium sulfate	120 kg N/ha	urea	CF	WS	1995	3	518		327		0.631274											3.3		3.72		1.12727	measured by an automated chamber system
Corton et al. (2000)	Philippines	Maligaya, Muñoz, Nueva Ecija	Ex	silty clay	6.88	13.2	fertilizer/amendment	phosphogypsum	0.5 Mg/ha	no phosphogypsum	CF	WS	1994	3	266		225		0.845865											5.22		4.9		0.938697	measured by an automated chamber system
Corton et al. (2000)	Philippines	Maligaya, Muñoz, Nueva Ecija	Ex	silty clay	6.88	13.2	fertilizer/amendment	phosphogypsum	1.0 Mg/ha	no phosphogypsum	CF	WS	1994	3	266		241		0.906015											5.22		5.27		1.00958	measured by an automated chamber system
Corton et al. (2000)	Philippines	Maligaya, Muñoz, Nueva Ecija	Ex	silty clay	6.88	13.2	fertilizer/amendment	phosphogypsum	6.0 Mg/ha	no phosphogypsum	CF	WS	1995	3	518		143		0.276062											3.3		3.78		1.14545	measured by an automated chamber system
Corton et al. (2000)	Philippines	Maligaya, Muñoz, Nueva Ecija	Ex	silty clay	6.88	13.2	fertilizer/amendment	phosphogypsum	3.0 Mg/ha	no phosphogypsum	CF	DS	1996	3	420		308		0.733333											7.13		7.2		1.00982	measured by an automated chamber system
Corton et al. (2000)	Philippines	Maligaya, Muñoz, Nueva Ecija	Ex	silty clay	6.88	13.2	fertilizer/amendment	phosphogypsum	3.0 Mg/ha	no phosphogypsum	CF	WS	1996	3	952		599		0.629202											5.22		5.27		1.00958	measured by an automated chamber system
Susilawati et al. (2015)	Indonesia	Jakenan, Pati, Central Java	Ex	loam	5.25	5.1	fertilizer/amendment	steel slug	1 Mg/ha	no steel slug	CF	DS	2009	5	180		198.667		1.1037	0.0608929		0.0480386		0.788903						4.36		4.6		1.05505
Susilawati et al. (2015)	Indonesia	Jakenan, Pati, Central Java	Ex	loam	5.25	5.1	fertilizer/amendment	steel slug	1 Mg/ha	no steel slug	CF	WS	2009/2010	5	446.667		405.333		0.907463	0.0303443		0.0217486		0.716727						8.79		9.21		1.04778
Susilawati et al. (2015)	Indonesia	Jakenan, Pati, Central Java	Ex	loam	5.25	5.1	fertilizer/amendment	steel slug	2 Mg/ha	no steel slug	CF	WS	2009/2010	5	446.667		398.667		0.892537	0.0303443		0.0200829		0.661833						8.79		9.21		1.04778
Susilawati et al. (2015)	Indonesia	Wedarijaksa, Pati, Central Java	F	silty clay	6.4	10.9	fertilizer/amendment	steel slug	1 Mg/ha	no steel slug	CF	DS	2009	5	6.65333		6.61333		0.993988	0.07227		0.0651043		0.900848						4.58		4.09		0.893013
Susilawati et al. (2015)	Indonesia	Wedarijaksa, Pati, Central Java	F	silty clay	6.4	10.9	fertilizer/amendment	steel slug	1 Mg/ha	no steel slug	CF	WS	2009/2010	5	4.13333		3.61333		0.874194	0.0723329		0.0529571		0.732131						6.9		7.23		1.04783
Susilawati et al. (2015)	Indonesia	Wedarijaksa, Pati, Central Java	F	silty clay	6.4	10.9	fertilizer/amendment	steel slug	2 Mg/ha	no steel slug	CF	WS	2009/2010	5	4.13333		3.36		0.812903	0.0723329		0.0445814		0.616337						6.9		6.93		1.00435
Suratno et al. (1998)	Indonesia	Bogor, West Java	Ex	clay	5.2	23.6	fertilizer/amendment	tablet urea	86 kg N/ha	granule urea for IR-64	CF	WS	1995	3						0.993143		1.06543		1.07278						4.06		4.11		1.01232
Suratno et al. (1998)	Indonesia	Bogor, West Java	Ex	clay	5.2	23.6	fertilizer/amendment	tablet urea	86 kg N/ha	granule urea for IR-64	SD	WS	1995	3						1.16286		1.419		1.22027						4.14		4.19		1.01208
Suratno et al. (1998)	Indonesia	Bogor, West Java	Ex	clay	5.2	23.6	fertilizer/amendment	tablet urea	86 kg N/ha	granule urea for Cisadane	CF	WS	1995	3						1.27757		1.64371		1.28659						4.42		5		1.13122
Suratno et al. (1998)	Indonesia	Bogor, West Java	Ex	clay	5.2	23.6	fertilizer/amendment	tablet urea	86 kg N/ha	granule urea for Cisadane	SD	WS	1995	3						1.72229		1.79457		1.04197						4.69		4.36		0.929638
Setyanto et al. (2000)	Indonesia	Jakenan, Central Java	Ex	silty clay	4.7	4.8	fertilizer/amendment	tablet urea	120 kg N/ha	prilled urea	CF	WS	1996/1997	3	170		104		0.611765											7.4		7.4		1	measured by an automated chamber system
Setyanto et al. (2000)	Indonesia	Jakenan, Central Java	Ex	silty clay	4.7	4.8	fertilizer/amendment	tablet urea	120 kg N/ha	prilled urea	rainfed	WS	1996/1997	3	37		45		1.21622											6.9		6.8		0.985507	measured by an automated chamber system
Setyanto et al. (2000)	Indonesia	Jakenan, Central Java	Ex	silty clay	4.7	4.8	fertilizer/amendment	tablet urea	120 kg N/ha	prilled urea	CF	DS	1997	3	181		163		0.900552											4.6		5		1.08696	measured by an automated chamber system
Setyanto et al. (2000)	Indonesia	Jakenan, Central Java	Ex	silty clay	4.7	4.8	fertilizer/amendment	tablet urea	120 kg N/ha	prilled urea	rainfed	DS	1997	3	88		102		1.15909											4.2		4.8		1.14286	measured by an automated chamber system
Trinh et al. (2017)	Vietnam	Thinh Long Commune,northern Vietnam	F		4.8	9	fertilizer/amendment	slow release urea (Neb26)	46 kg N/ha	normal urea		WS	2014	4	590.667		601.333		1.01806	0.972714		0.801429		0.82391	20.3725		20.6842		1.0153	5.33		5.86		1.09944
Trinh et al. (2017)	Vietnam	Thinh Long Commune,northern Vietnam	F		4.8	9	fertilizer/amendment	slow release urea (Agrotein)	46 kg N/ha	normal urea		WS	2014	4	590.667		582.667		0.986456	0.972714		0.689857		0.709208	20.3725		20.0162		0.982511	5.33		5.963		1.11876
Trinh et al. (2017)	Vietnam	Rang Dong Commune,northern Vietnam	F		5.9	4	fertilizer/amendment	slow release urea (Neb26)	46 kg N/ha	normal urea		WS	2014	4	674.667		721.333		1.06917	1.463		0.913		0.62406	23.3746		24.7974		1.06087	5.633		6		1.06515
Trinh et al. (2017)	Vietnam	Rang Dong Commune,northern Vietnam	F		5.9	4	fertilizer/amendment	slow release urea (Agrotein)	46 kg N/ha	normal urea		WS	2014	4	674.667		764		1.13241	1.463		0.837571		0.572503	23.3746		26.2256		1.12197	5.633		6.16		1.09356
Kantachote et al. (2016)	Thailand	Mae Rim District, Chiang Mai Province		silty clay	5.57	17.9	fertilizer/amendment	bio-fertilizer	TK103	carrier without strains		WS	2013	4	607.895	15.7895	553.947	10.5263	0.911255											1.2	0.01	1.281	0.012	1.0675
Kantachote et al. (2016)	Thailand	Mae Rim District, Chiang Mai Province		silty clay	5.57	17.9	fertilizer/amendment	bio-fertilizer	PP803	carrier without strains		WS	2013	4	607.895	15.7895	563.158	11.8421	0.926407											1.2	0.01	1.27	0.01	1.05833
Kantachote et al. (2016)	Thailand	Mae Rim District, Chiang Mai Province		silty clay	5.57	17.9	fertilizer/amendment	bio-fertilizer	TN114	carrier without strains		WS	2013	4	607.895	15.7895	519.737	10.5263	0.854978											1.2	0.01	1.43	0.011	1.19167
Kantachote et al. (2016)	Thailand	Ranot District, Songkhla Province		clay	5.05	11	fertilizer/amendment	bio-fertilizer	TK103	carrier without strains		DS	2014	4	874.804	22.8443	791.489	21.5006	0.904762											1.891	0.011	2.01	0.013	1.06293
Kantachote et al. (2016)	Thailand	Ranot District, Songkhla Province		clay	5.05	11	fertilizer/amendment	bio-fertilizer	PP803	carrier without strains		DS	2014	4	874.804	22.8443	849.272	17.4692	0.970814											1.891	0.011	2.061	0.011	1.0899
Kantachote et al. (2016)	Thailand	Ranot District, Songkhla Province		clay	5.05	11	fertilizer/amendment	bio-fertilizer	TN114	carrier without strains		DS	2014	4	874.804	22.8443	704.143	10.7503	0.804916											1.891	0.011	1.99	0.014	1.05235
*1 Ex: experimental field; F: farmer's field
*2 pH values in italic were measured with KCl, others with water
*3 SD: single drainage; MD: multiple drainage; AWD: alternate wetting and drying
Shaded data indicate mitigation options.

## Sheet: Sup_Table 5
Supplementary Table 5. Experimental data set for other planting methods option
Reference	Country	Site	Field type*1	Soil			Mitigation option			Baseline treatment	Water management*3	Season	Year	Number of replecation	CH4 EF (kg/ha)					N2O EF (kg/ha)					netGWP EF (Mg/ha)					Rice yield (Mg/ha)					Note
				Texture	pH*2	SOC (g C/kg)	Category	Type	Other treatment						Mean- control	SD- control	Mean-option	SD- option	Effect size	Mean- control	SD- control	Mean-option	SD- option	Effect size	Mean- control	SD- control	Mean-option	SD- option	Effect size	Mean- control	SD- control	Mean-option	SD- option	Effect size
Corton et al. (2000)	Philippines	Maligaya, Muñoz, Nueva Ecija	Ex	silty clay	6.88	13.2	other planting methods	direct seeding		transplanting	CF	DS	1997	3	89		75		0.842697											7.91		6.71		0.848293	measured by an automated chamber system
Corton et al. (2000)	Philippines	Maligaya, Muñoz, Nueva Ecija	Ex	silty clay	6.88	13.2	other planting methods	direct seeding		transplanting	SD	DS	1997	3	51		48		0.941176											7.74		6.42		0.829457	measured by an automated chamber system
Corton et al. (2000)	Philippines	Maligaya, Muñoz, Nueva Ecija	Ex	silty clay	6.88	13.2	other planting methods	direct seeding		transplanting	CF	WS	1997	3	348		272		0.781609											5.36		3.84		0.716418	measured by an automated chamber system
Corton et al. (2000)	Philippines	Maligaya, Muñoz, Nueva Ecija	Ex	silty clay	6.88	13.2	other planting methods	direct seeding		transplanting	SD	WS	1997	3	323		150		0.464396											5.45		3.41		0.625688	measured by an automated chamber system
Setyanto et al. (2000)	Indonesia	Jakenan, Central Java	Ex	silty clay	4.7	4.8	other planting methods	direct seeding		transplanting	CF	WS	1993/1994	3	229		256		1.1179											4.7		7.1		1.51064	measured by an automated chamber system
Setyanto et al. (2000)	Indonesia	Jakenan, Central Java	Ex	silty clay	4.7	4.8	other planting methods	direct seeding		transplanting	rainfed	WS	1993/1994	3	59		26		0.440678											6.5		4.4		0.676923	measured by an automated chamber system
Sander et al (2014)	Philippines	Los Baños	Ex	silty clay	6.6	18	other planting methods	fallow season management	dry with residue	flooded		WS&DS	2011/2012	4	680		300		0.441176	0.33		0.42		1.27273	23.2183		10.3252		0.444698	6.35		5.7		0.897638	mean values for 2 croping seasons
Sander et al (2014)	Philippines	Los Baños	Ex	silty clay	6.6	18	other planting methods	fallow season management	dry without residue	flooded		WS&DS	2011/2012	4	510		74		0.145098	0.46		0.83		1.80435	17.4771		2.76334		0.158112	6.4		6.3		0.984375	mean values for 2 croping seasons
Sander et al (2014)	Philippines	Los Baños	Ex	silty clay	6.6	18	other planting methods	fallow season management	dry + tillage with residue	flooded		WS&DS	2011/2012	4	680		280		0.411765	0.33		0.17		0.515152	23.2183		9.57066		0.412203	6.35		6.25		0.984252	mean values for 2 croping seasons
Sander et al (2014)	Philippines	Los Baños	Ex	silty clay	6.6	18	other planting methods	fallow season management	dry + tillage without residue	flooded		WS&DS	2011/2012	4	510		120		0.235294	0.46		0.74		1.6087	17.4771		4.30052		0.246066	6.4		6.5		1.01562	mean values for 2 croping seasons
Sander et al (2014)	Philippines	Los Baños	Ex	silty clay	6.6	18	other planting methods	fallow season management	dry and wet with residue	flooded		WS&DS	2011/2012	4	680		510		0.75	0.33		-0.044		-0.133333	23.2183		17.3269		0.746259	6.35		5.35		0.84252	mean values for 2 croping seasons
Sander et al (2014)	Philippines	Los Baños	Ex	silty clay	6.6	18	other planting methods	fallow season management	dry and wet without residue	flooded		WS&DS	2011/2012	4	510		170		0.333333	0.46		0.37		0.804348	17.4771		5.89026		0.337028	6.4		5.85		0.914062	mean values for 2 croping seasons
Weller et al. (2015)	Philippines	Los Baños	Ex	clay	6.1	18	other planting methods	aerobic rice	zero-N	flooded rice	aerobic rice	DS	2012	3	162.56	6.9513	6.21333	0.508068	0.0382218	0.66	0.13609	1.03714	0.244961	1.57143	5.72372		0.520322		0.0909062	3.27869	0.694082	1.0929	0.504787	0.333333
Weller et al. (2015)	Philippines	Los Baños	Ex	clay	6.1	18	other planting methods	aerobic rice	site specific N	flooded rice	aerobic rice	DS	2012	3	107.027	3.76432	6.93333	0.600444	0.0647814	2.53	0.462705	3.56714	0.762102	1.40994	4.39285		1.29874		0.295649	7.21311	0.315492	2.18579	1.19887	0.30303
Weller et al. (2015)	Philippines	Los Baños	Ex	clay	6.1	18	other planting methods	aerobic rice	conventional N	flooded rice	aerobic rice	DS	2012	3	115.747	4.27239	7.21333	1.20089	0.06232	1.55571	0.244961	2.37286	0.843756	1.52525	4.39899		0.952365		0.216496	6.55738	0.0630984	3.06011	1.00957	0.466667
Husin et al. (1995)	Indonesia	Sukamandi, West Java	Ex	clay			other planting methods	saturated soil	IR-64	CF	saturated	DS	1993	3	437		179		0.409611
Husin et al. (1995)	Indonesia	Sukamandi, West Java	Ex	clay			other planting methods	saturated soil	Cisadane	CF	saturated	DS	1993	3	381		90		0.23622
Setyanto and Baker (2005)	Indonesia	Jakenan, Pati, Central Java	Ex	clay loam	5.2	5.3	other planting methods	saturated soil		CF	saturated	DS	2002	3	254	29	185	12.9	0.728346											3.482	0.167	2.99	0.188	0.858702
Weller et al. (2015)	Philippines	Los Baños	Ex	clay	6.1	18	other planting methods	rotation (maize)	zero-N	flooded rice	upland	DS	2012	3	162.56	6.9513	1.28	0.207846	0.00787402	0.66	0.13609	0.99	0.163308	1.5	5.72372		0.33854		0.0591468	3.27869	0.694082	1.12933	0.504787	0.344444
Weller et al. (2015)	Philippines	Los Baños	Ex	clay	6.1	18	other planting methods	rotation (maize)	site specific N	flooded rice	upland	DS	2012	3	107.027	3.76432	1.13333	0.323316	0.0105893	2.53	0.462705	5.06	1.33368	2	4.39285		1.54641		0.35203	7.21311	0.315492	12.2404	5.93125	1.69697
Weller et al. (2015)	Philippines	Los Baños	Ex	clay	6.1	18	other planting methods	rotation (maize)	conventional N	flooded rice	upland	DS	2012	3	115.747	4.27239	0.946667	0.207846	0.00817878	1.55571	0.244961	6.20714	0.734884	3.9899	4.39899		1.88192		0.427806	6.55738	0.0630984	11.4754	3.21802	1.75
Cha-un et al. (2017)	Thailand	Ratchaburi Province	Ex	sandy loam	5.8	4	other planting methods	rotation	rice-fallow	rice-rice		DS&WS	2010	2	893.49		185.84		0.207993	1.54		5.77		3.74675	30.8376		8.03802		0.260657	4.6		4.31		0.936957	EF: DS+WS; Rice yield: only WS rice
Cha-un et al. (2017)	Thailand	Ratchaburi Province	Ex	sandy loam	5.8	4	other planting methods	rotation	rice-corn	rice-rice		DS&WS	2010	2	893.49		198.97		0.222689	1.54		7.77		5.04545	30.8376		9.08044		0.29446	4.6		4.72		1.02609	EF: DS+WS; Rice yield: only WS rice
Cha-un et al. (2017)	Thailand	Ratchaburi Province	Ex	sandy loam	5.8	4	other planting methods	rotation	rice-sorghum	rice-rice		DS&WS	2010	2	893.49		165.72		0.185475	1.54		8.93		5.7987	30.8376		8.29562		0.26901	4.6		4.7		1.02174	EF: DS+WS; Rice yield: only WS rice
Cha-un et al. (2017)	Thailand	Ratchaburi Province	Ex	sandy loam	5.8	4	other planting methods	rotation	rice-fallow	rice-rice		DS&WS	2011	2	1788.24		241.62		0.135116	1.22		3.41		2.79508	61.1637		9.23126		0.150927	2.79		3.84		1.37634	EF: DS+WS; Rice yield: only WS rice
Cha-un et al. (2017)	Thailand	Ratchaburi Province	Ex	sandy loam	5.8	4	other planting methods	rotation	rice-corn	rice-rice		DS&WS	2011	2	1788.24		289.15		0.161695	1.22		9.01		7.38525	61.1637		12.5161		0.204632	2.79		4.72		1.69176	EF: DS+WS; Rice yield: only WS rice
Cha-un et al. (2017)	Thailand	Ratchaburi Province	Ex	sandy loam	5.8	4	other planting methods	rotation	rice-sorghum	rice-rice		DS&WS	2011	2	1788.24		292.27		0.16344	1.22		10.41		8.53279	61.1637		13.0394		0.213188	2.79		4.73		1.69534	EF: DS+WS; Rice yield: only WS rice
*1 Ex: experimental field; F: farmer's field
*2 pH values in italic were measured with KCl, others with water
*3 SD: single drainage; MD: multiple drainage; AWD: alternate wetting and drying
Shaded data indicate mitigation options.
